# Supplementary material for: A Pentavalent Shigella flexneri LPS-Based Vaccine Candidate Is Safe and Immunogenic in Animal Models
Source: MDPI journal article supplement (doi:10.3390/vaccines11020345), 2023-02-03
Supplement: s1 [file s1]

Table S1. Histopathological changes of internal organs after single or multiple subcutaneous injections with 125 µg dose of PLVF.

| Organs and tissues | Histopathological changes |                       |
|--------------------|---------------------------|-----------------------|
|                    | Acute toxicity test       | Chronic toxicity test |
| Brain              | NF                        | NF                    |
| Lymth nodes        | NF                        | NF                    |
| Thyroid gland      | NF                        | NF                    |
| Heart              | NF                        | NF                    |
| Lung               | NF                        | NF                    |
| Thymus             | NF                        | NF                    |
| Stomach            | NF                        | NF                    |
| Small intestine    | NF                        | NF                    |
| Colon              | NF                        | NF                    |
| Liver              | NF                        | NF                    |
| Spleen             | NF                        | NF                    |
| Kidney             | NF                        | NF                    |
| Adrenal gland      | NF                        | NF                    |
| Testicle           | NF                        | NF                    |
| Ovary              | NF                        | NF                    |
| Peyer's patches    | NF                        | NF                    |

Note: NF – not found

Brain

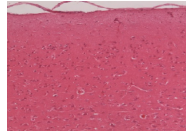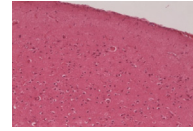

Lymph node

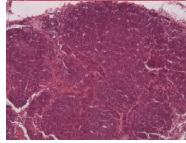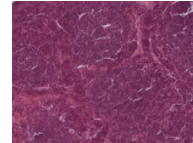

Thyroid gland

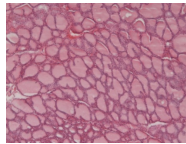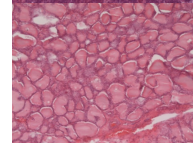

Heart

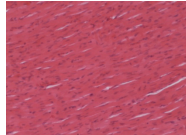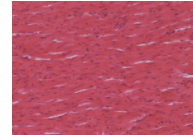

Lung

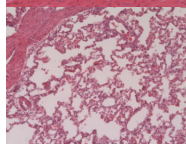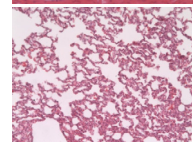

Thymus

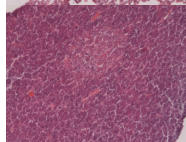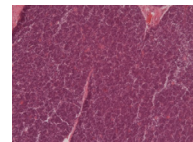

Stomach

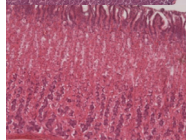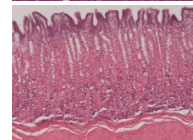

Small intestine

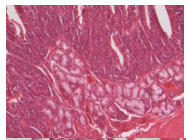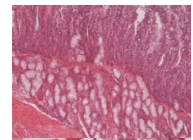

Colon

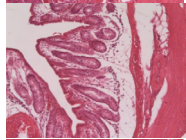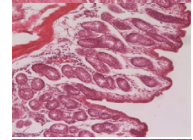

Liver

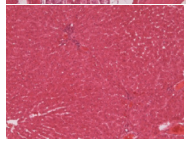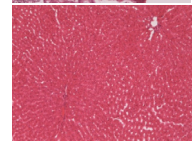

Spleen

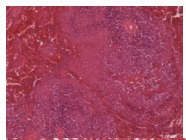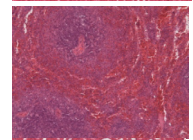

Kidney

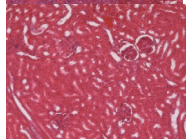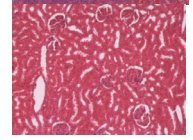

Adrenal gland

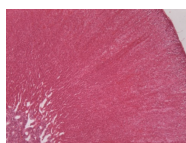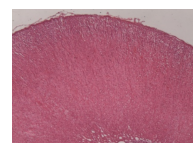

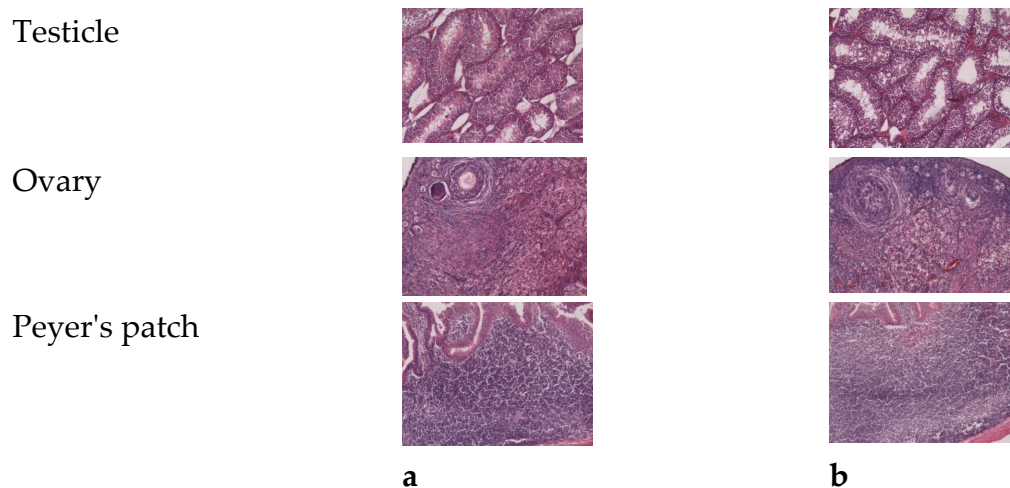

Figure S1. Hematoxylin and eosin stained sections of the internal organs of rabbits from the control group (a) and 7 days after the last injection of PLVF (b). PLVF was administered subcutaneously at a dose of 125  $\mu$ g daily for a week. Representative images from 5 groups

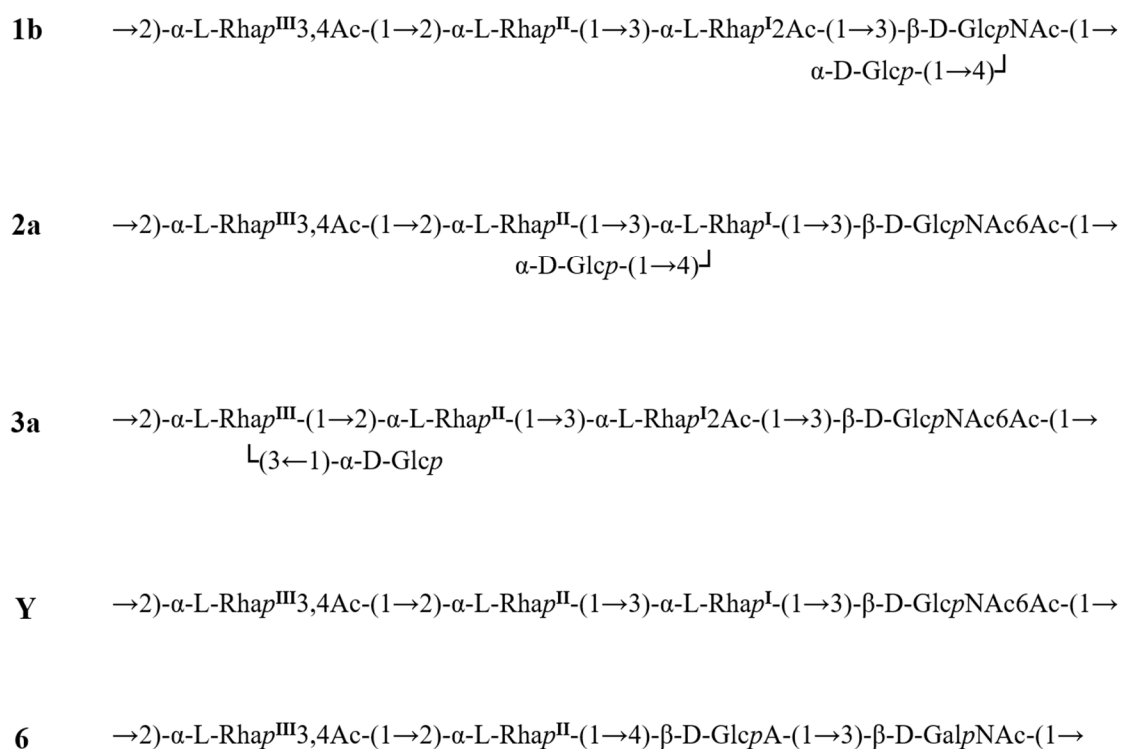

Figure S2. Chemical structure of the repeating unit of the O-specific polysaccharide chain of *S. flexneri* serotypes 1b, 2a, 3a, 6, and Y.
